# Supplementary material for: Reconciling Biodiversity Conservation and Widespread Deployment of Renewable Energy Technologies in the UK
Source: PLOS journal article supplement (doi:10.1371/journal.pone.0150956), 2016-05-25
Supplement: S5 (10.1371/journal.pone.0150956.s005) [file journal.pone.0150956.s005]

**S5 Table. Policy constraints for all offshore technologies.** Including constraint types showing which technologies they are applied to and the level of constraint, from level one (least constrained) to level three (most constrained); plus data sources.

| <b>Constraint</b>                                                                                                                                                                                                                                                                                                                                                                                                                                                                            | <b>Technology type</b> | <b>Level 1 (low)</b> | <b>Level 2 (medium)</b> | <b>Level 3 (high)</b> | <b>Source</b>      |
|----------------------------------------------------------------------------------------------------------------------------------------------------------------------------------------------------------------------------------------------------------------------------------------------------------------------------------------------------------------------------------------------------------------------------------------------------------------------------------------------|------------------------|----------------------|-------------------------|-----------------------|--------------------|
| AONBs                                                                                                                                                                                                                                                                                                                                                                                                                                                                                        | All                    | ✓                    | ✓                       | ✓                     | CCW; NE; NIEA      |
| Bivalve Harvest areas                                                                                                                                                                                                                                                                                                                                                                                                                                                                        | All                    | ✗                    | ✗                       | ✓                     | CEFAS              |
| Fishery Orders                                                                                                                                                                                                                                                                                                                                                                                                                                                                               | All                    | ✗                    | ✗                       | ✓                     | TCE                |
| Helicopter safety zones                                                                                                                                                                                                                                                                                                                                                                                                                                                                      | All                    | 5.6-7.4 km           | 5.6-9.3 km              | 5.6-11.1 km           | TCE                |
| Heritage Coast                                                                                                                                                                                                                                                                                                                                                                                                                                                                               | All                    | ✓                    | ✓                       | ✓                     | CCW; NE            |
| Inshore shipping zones                                                                                                                                                                                                                                                                                                                                                                                                                                                                       | All                    | ✗                    | ✗                       | Inshore               | SeaZone            |
| MoD Practice and Exercise Areas (PEXA)                                                                                                                                                                                                                                                                                                                                                                                                                                                       | All                    | ✗                    | ✗                       | ✓                     | SeaZone            |
| National Parks                                                                                                                                                                                                                                                                                                                                                                                                                                                                               | All                    | ✓                    | ✓                       | ✓                     | CCW; NE; SNH       |
| National Scenic Areas                                                                                                                                                                                                                                                                                                                                                                                                                                                                        | All                    | ✓                    | ✓                       | ✓                     | SE                 |
| Royal Yachting Association Areas                                                                                                                                                                                                                                                                                                                                                                                                                                                             | All                    | ✗                    | ✗                       | ✓                     | RYA                |
| Scheduled Ancient Monuments                                                                                                                                                                                                                                                                                                                                                                                                                                                                  | All                    | ✗                    | ✗                       | ✓                     | Cadw; CMRC; EH; HS |
| Shipping density                                                                                                                                                                                                                                                                                                                                                                                                                                                                             | All                    | Top 5%               | Top 15%                 | Top 25%               | Anatec             |
| MoD highest priority low fly zones                                                                                                                                                                                                                                                                                                                                                                                                                                                           | Wind                   | ✓                    | ✓                       | ✓                     | MoD                |
| Abbreviations: Cadw – Welsh Government’s historic environment service; CCW – Countryside Commission for Wales; CEFAS – Centre for Environment, Fisheries and Aquaculture Science; CMRC – Coastal and Marine Resources Centre; EH – English Heritage; HS – Historic Scotland; MoD – Ministry of Defence; NE – Natural England; NIEA – Northern Ireland Environment Agency; SNH – Scottish Natural Heritage; TCE – The Crown Estate; SE – Scottish Executive; RYA – Royal Yachting Association |                        |                      |                         |                       |                    |
