# Supplementary material for: Reconciling Biodiversity Conservation and Widespread Deployment of Renewable Energy Technologies in the UK
Source: PLOS journal article supplement (doi:10.1371/journal.pone.0150956), 2016-05-25
Supplement: S8 (10.1371/journal.pone.0150956.s008) [file journal.pone.0150956.s008]

**S8 Table. Individual species included in the energy crops and solar farm sensitivity maps.**  
Including details of buffer distances, sensitivity levels and data sources

| Species                                      | Buffer (km)      |                    | Data Source                                                    | Reference (sensitivity) |
|----------------------------------------------|------------------|--------------------|----------------------------------------------------------------|-------------------------|
|                                              | High sensitivity | Medium sensitivity |                                                                |                         |
| Black grouse<br><i>Lyrurus tetrix</i>        | -                | 1.5                | National Survey 2005, plus regional datasets                   | [1]                     |
| Golden eagle<br><i>Aquila chrysaetos</i>     | 2.5              | 6                  | National Survey 2003                                           | [1]                     |
| Golden eagle<br><i>Aquila chrysaetos</i>     | -                | 6                  | National Survey 1992                                           | [1]                     |
| Hen harrier<br><i>Circus cyaneus</i>         | 2                | -                  | National Survey 2010                                           | [1]                     |
| Hen harrier<br><i>Circus cyaneus</i>         | -                | 2                  | National Survey 2004                                           | [1]                     |
| Merlin<br><i>Falco columbianus</i>           | 0.5              | -                  | National Survey 2008                                           | [2]                     |
| Corncrake<br><i>Crex crex</i>                | 0.85             | -                  | Annual surveys 2003 onwards                                    | [1]                     |
| Stone curlew<br><i>Burhinus oedicephalus</i> | 1                | -                  | RSPB annual monitoring surveys                                 | [3]                     |
| Nightjar<br><i>Caprimulgus europaeus</i>     | 1                | 2.5                | National Survey 2004                                           | [1]                     |
| Woodlark<br><i>Lullula arborea</i>           | 0.5              | 1                  | National Survey 2006                                           | [4]                     |
| Chough<br><i>Pyrrhocorax pyrrhocorax</i>     | 1                | -                  | National Survey 2002 plus additional data from NI and Cornwall | [1]                     |
| Dartford warbler<br><i>Sylvia undata</i>     | 0.5              | 1                  | National Survey 2006                                           | [4]                     |
| Cirl bunting<br><i>Emberiza cirlus</i>       | 0.5              | 1                  | National Survey 2009                                           | [5]                     |

[1] Bright JA, Langston RHW, Bullman R, Evans RJ, Gardner S, Pearce-Higgins J et al. Bird sensitivity map to provide locational guidance for onshore wind farms in Scotland. Edinburgh: RSPB; 2006. Available: [https://www.rspb.org.uk/Images/sensitivitymapreport\\_tcm9-157990.pdf](https://www.rspb.org.uk/Images/sensitivitymapreport_tcm9-157990.pdf). Accessed 2015 Oct 27.

[2] Ruddock M, Whitfield DP. A Review of Disturbance Distances in Selected Bird Species. A report from Banchory: Natural Research Ltd.; 2007. <http://www.snh.org.uk/pdfs/strategy/renewables/BIRDSD.pdf>.

[3] Bright JA, Langston RHW, Anthony S. Mapped and written guidance in relation to birds and onshore wind energy development in England. Sandy: RSPB; 2009. Available: [http://www.rspb.org.uk/Images/EnglishSensitivityMap\\_tcm9-237359.pdf](http://www.rspb.org.uk/Images/EnglishSensitivityMap_tcm9-237359.pdf). Accessed 2015 Oct 27.

[4] Currie F, Elliott G. Forests and Birds: a guide to managing forests for rare birds. Sandy: RSPB/Forestry Authority; 1997.

[5] Stevens DK, Donald PF, Evans AD, Buckingham DL, Evans J. Territory distribution and foraging patterns of cirl buntings (*Emberiza cirlus*) breeding in the UK. Biol Conserv 2002; 107: 307-313.
