# Supplementary material for: Reconciling Biodiversity Conservation and Widespread Deployment of Renewable Energy Technologies in the UK
Source: PLOS journal article supplement (doi:10.1371/journal.pone.0150956), 2016-05-25
Supplement: S9 (10.1371/journal.pone.0150956.s009) [file journal.pone.0150956.s009]

**S9 Table. Species included at the assemblage level in the energy crops and solar farm sensitivity maps.**

| Species <sup>a</sup>                                                                                                                                                                                                                                                                                                                                                                                                                                                                                                                                                                       | Assemblage <sup>b</sup> |
|--------------------------------------------------------------------------------------------------------------------------------------------------------------------------------------------------------------------------------------------------------------------------------------------------------------------------------------------------------------------------------------------------------------------------------------------------------------------------------------------------------------------------------------------------------------------------------------------|-------------------------|
| Grey partridge <i>Perdix perdix</i>                                                                                                                                                                                                                                                                                                                                                                                                                                                                                                                                                        | arable                  |
| Turtle dove <i>Streptopelia turtur</i>                                                                                                                                                                                                                                                                                                                                                                                                                                                                                                                                                     | arable                  |
| Sky Lark <i>Alauda arvensis</i>                                                                                                                                                                                                                                                                                                                                                                                                                                                                                                                                                            | arable                  |
| Yellow wagtail <i>Motacilla flava</i>                                                                                                                                                                                                                                                                                                                                                                                                                                                                                                                                                      | arable                  |
| Whinchat <i>Saxicola rubetra</i>                                                                                                                                                                                                                                                                                                                                                                                                                                                                                                                                                           | arable                  |
| Tree sparrow <i>Passer montanus</i>                                                                                                                                                                                                                                                                                                                                                                                                                                                                                                                                                        | arable                  |
| Linnet <i>Carduelis cannabina</i>                                                                                                                                                                                                                                                                                                                                                                                                                                                                                                                                                          | arable                  |
| Twite <i>Carduelis flavirostris</i>                                                                                                                                                                                                                                                                                                                                                                                                                                                                                                                                                        | arable                  |
| Reed bunting <i>Emberiza schoeniclus</i>                                                                                                                                                                                                                                                                                                                                                                                                                                                                                                                                                   | arable                  |
| Yellowhammer <i>Emberiza citrinella</i>                                                                                                                                                                                                                                                                                                                                                                                                                                                                                                                                                    | arable                  |
| Corn bunting <i>Miliaria calandra</i>                                                                                                                                                                                                                                                                                                                                                                                                                                                                                                                                                      | arable                  |
| Oystercatcher <i>Haematopus ostralegus</i>                                                                                                                                                                                                                                                                                                                                                                                                                                                                                                                                                 | farmland wader          |
| Northern Lapwing <i>Vanellus vanellus</i>                                                                                                                                                                                                                                                                                                                                                                                                                                                                                                                                                  | farmland wader          |
| Redshank <i>Tringa totanus</i>                                                                                                                                                                                                                                                                                                                                                                                                                                                                                                                                                             | farmland wader          |
| Curlew <i>Numenius arquata</i>                                                                                                                                                                                                                                                                                                                                                                                                                                                                                                                                                             | farmland wader          |
| Snipe <i>Gallinago gallinago</i>                                                                                                                                                                                                                                                                                                                                                                                                                                                                                                                                                           | farmland wader          |
| Golden plover <i>Pluvialis apricaria</i>                                                                                                                                                                                                                                                                                                                                                                                                                                                                                                                                                   | upland wader            |
| Dunlin <i>Calidris alpina</i>                                                                                                                                                                                                                                                                                                                                                                                                                                                                                                                                                              | upland wader            |
| <sup>a</sup> Data was obtained from <i>Bird Atlas 2007–11</i> [1], which is a joint project between BTO, BirdWatch Ireland and the Scottish Ornithologists' Club.<br><sup>b</sup> Areas were not categorised by land cover, so if any area had a high score based on either 'upland wader', 'farmland wader' or 'arable' assemblages then it qualified as medium sensitivity.<br>[1] Balmer D, Gillings S, Caffrey B, Swann R, Downie I, Fuller R. <i>Bird Atlas 2007–11: the breeding and wintering birds of Britain and Ireland</i> . Thetford: BTO Books; 2013. ISBN 978-1-908581-28-0. |                         |
