# Supplementary material for: Reconciling Biodiversity Conservation and Widespread Deployment of Renewable Energy Technologies in the UK
Source: PLOS journal article supplement (doi:10.1371/journal.pone.0150956), 2016-05-25
Supplement: S18 (10.1371/journal.pone.0150956.s018) [file journal.pone.0150956.s018]

**S18 Table. Estimated sea areas available for the deployment of wave energy.** Areas available under different scenarios, considering the available resource along with physical, policy and ecological constraints.

| Offshore wave energy    |                                              | High ecological risk scenario | Medium ecological risk scenario   | Low ecological risk scenario                 |
|-------------------------|----------------------------------------------|-------------------------------|-----------------------------------|----------------------------------------------|
|                         |                                              | (no sensitivity applied)      | (high sensitivity areas excluded) | (medium and high sensitivity areas excluded) |
| Opportunity             | Constraints                                  | Area (km <sup>2</sup> )       | Area (km <sup>2</sup> )           | Area (km <sup>2</sup> )                      |
| Prime                   | <i>None</i>                                  | 34,411                        | 23,580                            | 2,868                                        |
|                         | <i>Physical only</i>                         | 31,918                        | 21,672                            | 2,832                                        |
|                         | <i>Physical + Policy level 1</i>             | 31,708                        | 21,608                            | 2,829                                        |
|                         | <i>Physical + Policy levels 1 &amp; 2</i>    | 31,386                        | 21,365                            | 2,829                                        |
|                         | <i>Physical + Policy levels 1, 2 &amp; 3</i> | 25,054                        | 18,296                            | 2,641                                        |
| Prime & good            | <i>None</i>                                  | 200,214                       | 151,439                           | 80,140                                       |
|                         | <i>Physical only</i>                         | 185,788                       | 139,230                           | 74,071                                       |
|                         | <i>Physical + Policy level 1</i>             | 183,050                       | 137,473                           | 73,058                                       |
|                         | <i>Physical + Policy levels 1 &amp; 2</i>    | 171,927                       | 127,721                           | 67,728                                       |
|                         | <i>Physical + Policy levels 1, 2 &amp; 3</i> | 129,235                       | 101,419                           | 58,903                                       |
| Prime, good & technical | <i>None</i>                                  | 244,546                       | 192,594                           | 121,272                                      |
|                         | <i>Physical only</i>                         | 223,705                       | 174,567                           | 109,387                                      |
|                         | <i>Physical + Policy level 1</i>             | 219,519                       | 171,503                           | 107,067                                      |
|                         | <i>Physical + Policy levels 1 &amp; 2</i>    | 206,311                       | 159,844                           | 99,830                                       |
|                         | <i>Physical + Policy levels 1, 2 &amp; 3</i> | 159,068                       | 129,263                           | 86,726                                       |
